# Supplementary figures and images for: Exploratory Genome-Wide Interaction Analysis of Nonsteroidal Anti-inflammatory Drugs and Predicted Gene Expression on Colorectal Cancer Risk
Source: Oxford University Press journal article supplement (doi:10.1158/1055-9965.epi-19-1018), 2020-07-10

**Supplemental Figure 1. Flow chart of the data harmonization process**

**
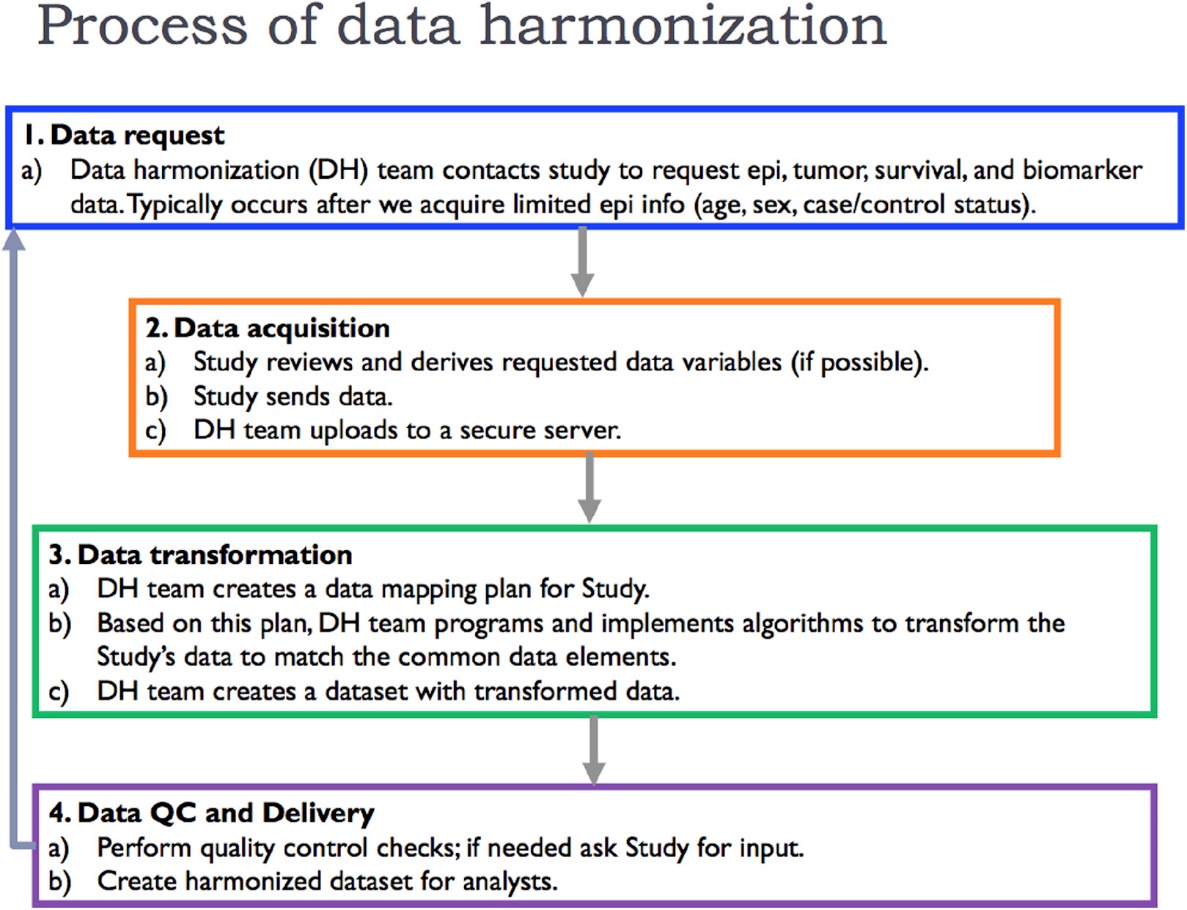
**

Supplement: 10559965epi191018-sup-227711_2_supp_5964066_q2k111.docx [file 10559965epi191018-sup-227711_2_supp_5964066_q2k111.docx]
